# Supplementary material for: Morphology dependence of Nb2O5-supported cobalt oxide in catalytic toluene oxidation
Source: Royal Society of Chemistry journal article supplement (doi:10.1039/d4cy00596a), 2024-01-01
Supplement: d4cy00596a1.pdf [file d4cy00596a1.pdf]

## Supporting Information

# Morphology dependence of Nb<sub>2</sub>O<sub>5</sub> Supported Cobalt oxide on Catalytic Toluene Oxidation

*Shuangju Li<sup>a</sup>, Xueli Cheng<sup>a</sup>, Wei Zhou<sup>b</sup>, Junxiang Jiang<sup>a</sup>, Chao Feng<sup>a</sup>, Yuanshuai Liu<sup>a</sup> \*,  
Xuebing Li<sup>c</sup>, Xiaodong Zhang<sup>d</sup>, Zhong Wang<sup>a</sup> \**

<sup>a</sup> Key Laboratory of Biofuels, Qingdao Institute of Bioenergy and Bioprocess Technology, Chinese Academy of Sciences, Qingdao 266101, Shandong Province, PR China.

<sup>b</sup> Tongliao Technology Service Center of Ecological and Environment, Tongliao 028000, PR China.

<sup>c</sup> College of Materials Science and Engineering, Ningbo University of Technology, Ningbo 315211, PR China.

<sup>d</sup> Environment and Low-Carbon Research Center, School of Environment and Architecture, University of Shanghai for Science and Technology, Shanghai 200093, PR China.

\* E-mail: liuys@qibebt.ac.cn (Y. Liu); wangzhong@qibebt.ac.cn (Z. Wang)

# Catalyst Characterisation

X-ray diffraction (XRD) patterns were obtained through Bruker AXS-D8 Advance between  $5^\circ$  and  $80^\circ$  at a step length of  $5^\circ \text{ min}^{-1}$  with a Cu  $K\alpha$  radiation ( $\lambda = 0.154056 \text{ nm}$ ).

Elemental analysis was performed using the Inductively Coupled Plasma Optical Emission Spectrometry (ICP-OES) technique on Agilent720ES.

The  $\text{N}_2$  adsorption–desorption isotherm, BET surface area, t-plot area, pore size, and pore volume of the catalysts were measured at  $-196^\circ \text{C}$  with a Micromeritics ASAP2010 instrument by using the Barrett-Joyner-Halenda method. Before the test, each sample was pretreated at  $573 \text{ K}$  for  $2 \text{ h}$  under  $7\text{-}10 \text{ mmHg}$ .

Transmission electron microscopy (TEM) and high-resolution TEM images were collected on a JEM-F200 instrument at a voltage of  $200 \text{ kV}$ . The as-prepared samples were first treated to ultrasonic dispersion in ethanol and subsequently dried on a carbon film supported with a copper grid.

X-ray photoelectron spectroscopy (XPS) patterns were measured on a Thermo Scientific ESCALAB 250Xi spectrometer electronic energy spectrum at  $300 \text{ W}$  by using Al  $K\alpha$  X-rays as the excitation source. The data were processed using XPS-PEAK software, and surface element contents were calculated through XPS peak areas. The binding energies were calibrated using C  $1s$  at  $284.8 \text{ eV}$ .

$\text{H}_2$ -temperature programmed reduction ( $\text{H}_2$ -TPR) was performed on a Micromeritics AutoChem II 2920 apparatus. Briefly,  $100 \text{ mg}$  of samples with  $40\text{-}60$  mesh was pretreated at  $300^\circ \text{C}$  for  $70 \text{ min}$  in the helium atmosphere in the U-shape quartz reactor. For  $\text{H}_2$ -TPR, the samples were first cooled down to  $30^\circ \text{C}$  and then were reacted with hydrogen from  $50$  to  $750^\circ \text{C}$  with a heating rate of  $10^\circ \text{C min}^{-1}$  under the atmosphere of  $10\% \text{ H}_2/\text{He}$  ( $50 \text{ mL}\cdot\text{min}^{-1}$ ).

NH<sub>3</sub>-temperature programmed desorption (NH<sub>3</sub>-TPD) was performed on a Micromeritics AutoChem II 2920 apparatus. Briefly, 100 mg of samples with 40-60 mesh was pretreated at 500 °C for 60 min in the Ar flow in the U-shape quartz reactor. Then the samples were first cooled down to 50 °C and the gas mixture (30ml/min) of 10% NH<sub>3</sub>/Ar was introduced to absorb for 1h. Pure Ar was purged to remove the excess NH<sub>3</sub>. Then the desorption was conducted by heating the temperature to 800°C (10°C/min).

## Density functional theory Calculations

All calculations were performed using the density functional theory (DFT) technique using the Vienna ab initio simulation package (VASP). Spin-polarized calculations were performed using the generalized gradient approximation (GGA) combined with the Perdew–Burke–Ernzerhof (PBE) method to determine the exchange and correlation energies. The projector-augmented wave (PAW) method was used to represent the core–valence electron interactions. The typical plane-wave cutoff energy was 400 eV for basis-set expansion. For geometry optimization calculations, forces were converged below 0.03 eV/Å. The SCF convergence energy was 1×10<sup>-4</sup> Ha. A 1×1×1 k-point mesh was used to perform all the calculations.

Two-layer slab model surfaces of Nb<sub>2</sub>O<sub>5</sub> (001) and (180) substitution was built to calculate the adsorption energies and Gibbs free energies. Two p (3×3) unit cell expansions were used to model the surface of Nb<sub>2</sub>O<sub>5</sub> (001) and (180). A vacuum of 15 Å was used to simulate the surface under periodic boundary conditions.

The adsorption energy ( $E_{ads}$ ) of the C<sub>7</sub>H<sub>8</sub>, and the other molecule on the surface was calculated as follows (eq 1):

$$E_{ads} = E_{adsorbate + surface} - E_{surface} - E_{gas} \quad (1)$$

where  $E_{\text{surface}}$  is the clean surface relaxation energy of the surface slab,  $E_{\text{gas}}$  is the energy of a free gas molecule under conditions of vacuum, and  $E_{\text{adsorbate+surface}}$  is the energy of the composite system. As the calculations are performed at 0 K at a fixed cell volume, the differences in the Gibbs free energy should equal the differences in the total energy. By this definition, a negative value of  $E_{\text{ads}}$  corresponds to exothermic and spontaneous adsorption processes.

The barrier energy,  $\Delta E$ , for a difference between transition state energy difference and standard product formation enthalpy is defined as follows. The energy barrier calculation of  $\text{O}_2$  to O-O on  $\text{CoO}_x/\text{Nb}_2\text{O}_5(001)$  as an example (eq 2):

$$\Delta E = (E_{\text{O-O-CN001}} - E_{\text{stab-CN001}}) - (E_{\text{O}_2-\text{CN001}} - E_{\text{stab-CN001}}) \quad (2)$$

where  $E_{\text{O-O-CN001}}$  and  $E_{\text{O}_2-\text{CN001}}$  are the energies of the O-O and  $\text{O}_2$  adsorbed on  $\text{CoO}_x/\text{Nb}_2\text{O}_5(001)$ ,  $E_{\text{stab-CN001}}$  is the energy of the  $\text{CoO}_x/\text{Nb}_2\text{O}_5(001)$  surface slab. As the calculations are performed at  $t=0$  K at a fixed cell volume, the differences in the Gibbs free energy should equal the differences in the total energy. By this definition, the lower the  $\Delta E$  is, the easier it is to react.

Figures

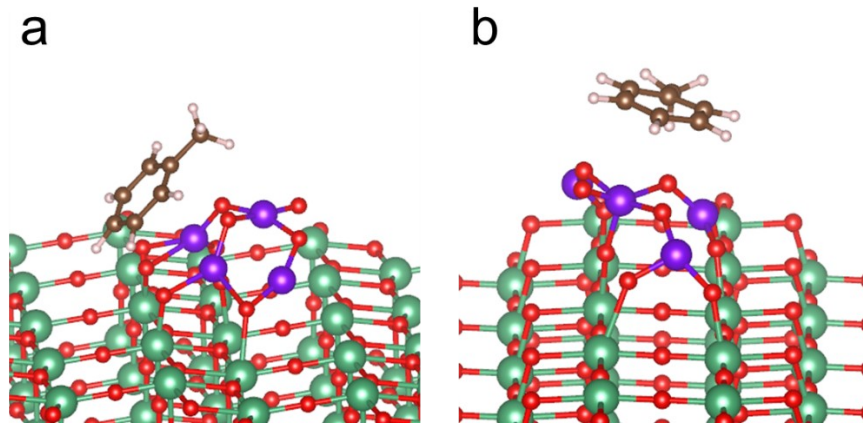

**Figure S1** Models of toluene adsorption energies on (a)  $\text{CoO}_x/\text{Nb}_2\text{O}_5(001)$ , (b)  $\text{CoO}_x/\text{Nb}_2\text{O}_5(180)$ .

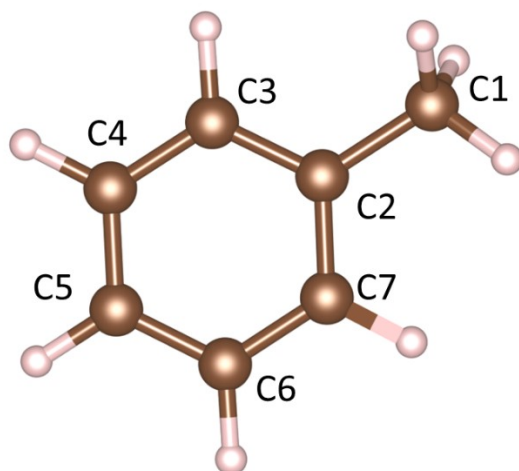

**Figure S2** Carbon atom number of toluene model.

## Table

**Table S1** The bader charge and state value of CoO<sub>x</sub>/Nb<sub>2</sub>O<sub>5</sub>(180), (b) CoO<sub>x</sub>/Nb<sub>2</sub>O<sub>5</sub>(001).

| Sample                                                 | Atom    | Bader Charge | State Value |
|--------------------------------------------------------|---------|--------------|-------------|
| CoO <sub>x</sub> /Nb <sub>2</sub> O <sub>5</sub> (180) | Co1     | 7.686        | 2.628       |
|                                                        | Co2     | 7.743        | 2.515       |
|                                                        | Co3     | 7.652        | 2.697       |
|                                                        | Co4     | 8.210        | 1.581       |
|                                                        | Average | 7.823        | 2.355       |
| CoO <sub>x</sub> /Nb <sub>2</sub> O <sub>5</sub> (001) | Co1     | 7.515        | 2.971       |
|                                                        | Co2     | 7.657        | 2.686       |
|                                                        | Co3     | 7.704        | 2.592       |
|                                                        | Co4     | 7.793        | 2.415       |
|                                                        | Average | 7.667        | 2.666       |

**Table S2** Toluene adsorption value calculated by DFT calculation.

| Sample                                                 | C1-C2 | $\Delta$ C1-C2 | C1-H  | $\Delta$ C1-H | Co-C  | C1-C2-C5 | $\Delta$ C1-C2-C5 |
|--------------------------------------------------------|-------|----------------|-------|---------------|-------|----------|-------------------|
| CoO <sub>x</sub> /Nb <sub>2</sub> O <sub>5</sub> (180) | 1.514 | 0.013          | 1.101 | 0.003         | 2.467 | 169.052  | -10.845           |
|                                                        |       |                | 1.100 | 0.000         |       |          |                   |
|                                                        |       |                | 1.097 | -0.006        |       |          |                   |
| CoO <sub>x</sub> /Nb <sub>2</sub> O <sub>5</sub> (001) | 1.502 | 0.001          | 1.096 | -0.002        | 2.677 | 169.809  | -10.088           |
|                                                        |       |                | 1.103 | 0.003         |       |          |                   |
|                                                        |       |                | 1.098 | -0.005        |       |          |                   |
| C <sub>7</sub> H <sub>8</sub>                          | 1.501 |                | 1.098 |               |       | 179.896  |                   |
|                                                        |       |                | 1.100 |               |       |          |                   |
|                                                        |       |                | 1.103 |               |       |          |                   |
